# Supplementary material for: Fluorescence Intensity Normalisation: Correcting for Time Effects in Large-Scale Flow Cytometric Analysis
Source: PubMed Central journal article supplement (PMC2798117; doi:10.1155/2009/476106), 2009-11-17
Supplement: 476106.f1.pdf [file 476106.f1.pdf]

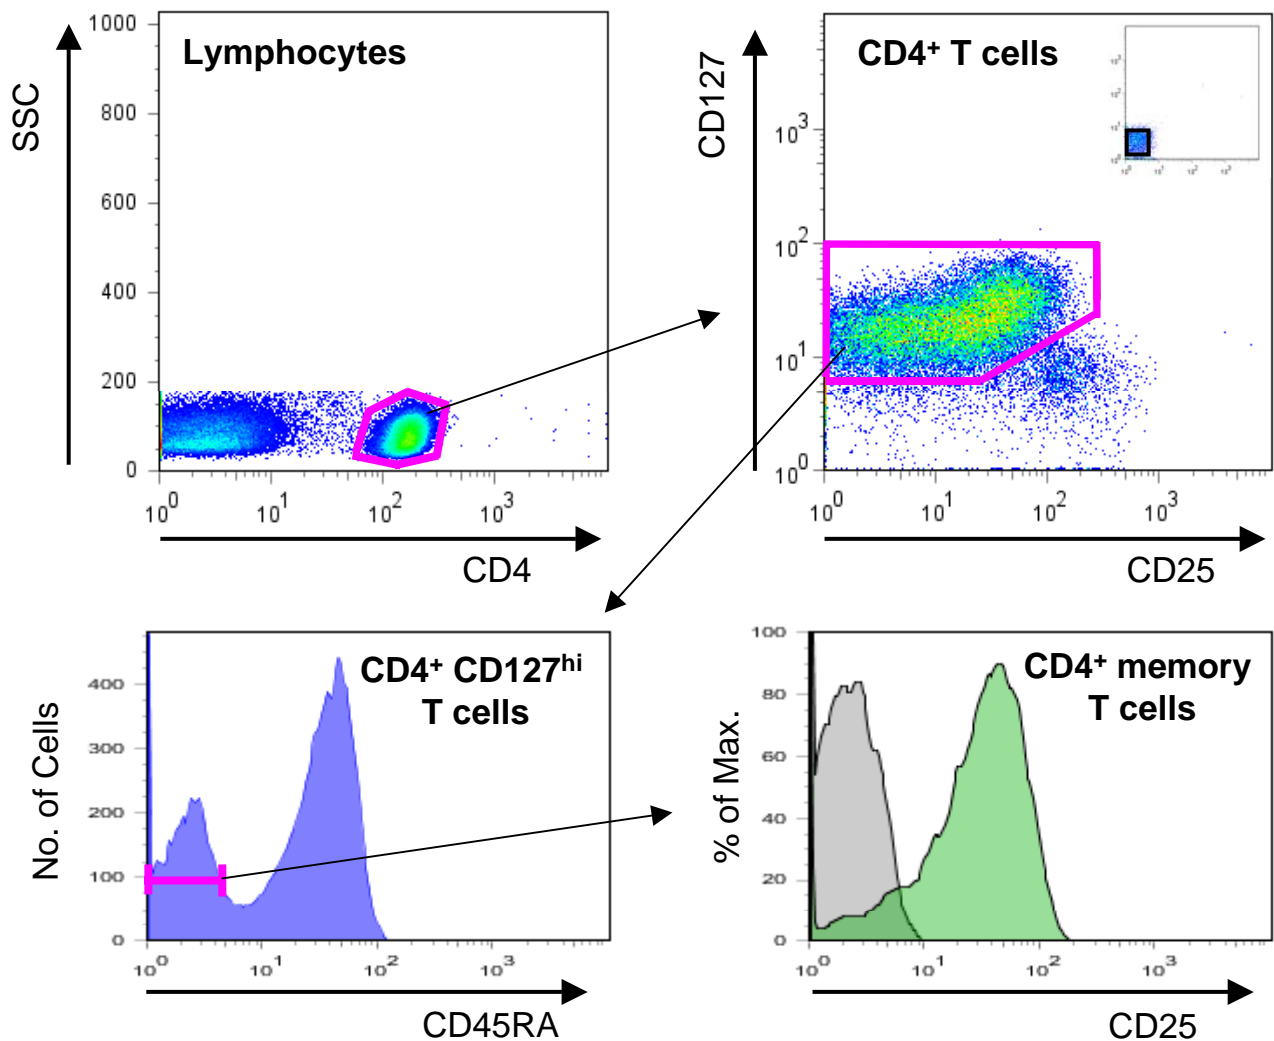

**Supplementary Figure S1** Representative gating of total CD4<sup>+</sup> T cells and CD4<sup>+</sup> memory T cells. Lymphocytes were gated on their forward and side scatter properties (data not shown), and CD4<sup>+</sup> T cells were gated from the lymphocyte subset. The CD4<sup>+</sup> T cells were then gated on their IL-7R/CD127 expression (with the CD127<sup>int-low</sup> CD25<sup>hi</sup> cells constituting the CD4<sup>+</sup> CD25<sup>hi</sup> regulatory T cell subset). The inset plot shows isotype control staining. The CD127<sup>hi</sup> cells were further gated on CD45RA to define the CD4<sup>+</sup> CD127<sup>hi</sup> CD45RA<sup>neg</sup> subset that is the CD4<sup>+</sup> memory T cell population. The mean fluorescence intensity of CD25 was measured for this CD4<sup>+</sup> memory T cell population (the isotype control staining is shown in grey). “% of Max” is calculated as the cell number in each bin divided by the cell number in the bin containing the largest cell number; this statistic is calculated as a normalisation for different numbers of events collected for each sample that is overlaid (<http://www.treestar.com/flowjo/>). SSC = Side scatter.
